# Supplementary material for: PRAS40 prevents development of diabetic cardiomyopathy and improves hepatic insulin sensitivity in obesity
Source: PubMed Central journal article supplement (PMC3936489; doi:10.1002/emmm.201303183), 2013-10-31
Supplement: emmm0006-0057-sd3.pdf [file emmm0006-0057-sd3.pdf]

## Supporting Figure 2

A

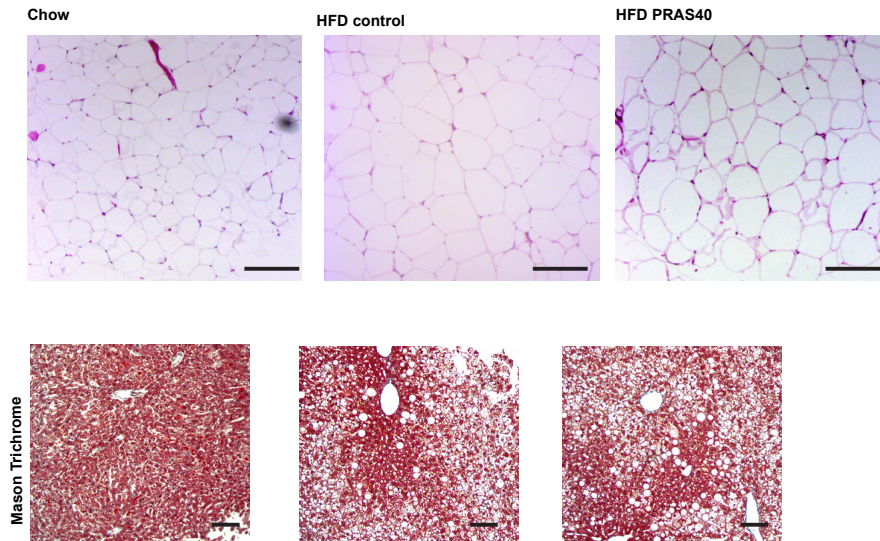

B

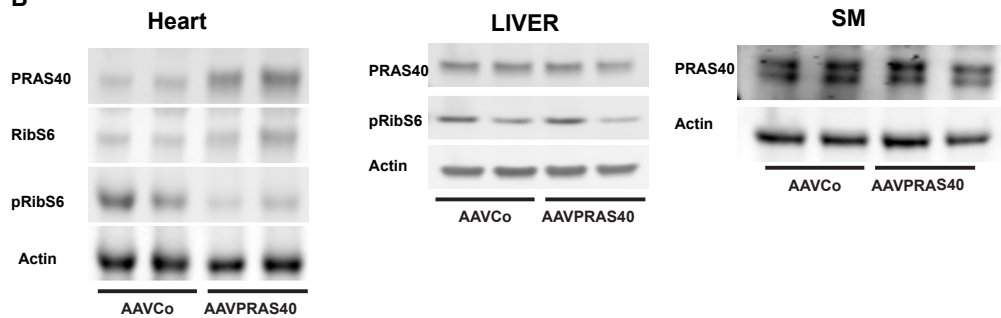

C

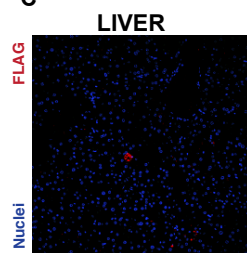

**Supporting Figure 2.** H&E staining of WAT sections from either Chow-fed or HFD-fed mice injected with AAV-Control or AAV-PRAS40. Mason-trichrome staining of liver sections from either Chow-fed or HFD-fed mice injected with AAV-Control or AAV-PRAS40. Scale bar 150 $\mu$ m. **(B)** Immunoblots from hearts, liver and skeletal muscle (SM) from either AAV-Control

or AAV-PRAS40 injected animals. (C) Confocal microscopy of paraffin-embedded liver sections after AAV-PRAS40 injections stained for FLAG-tag (red), Actin (green) and nuclei (blue). Only single cells are positive for the FLAG-tag.

### Supporting Figure 3

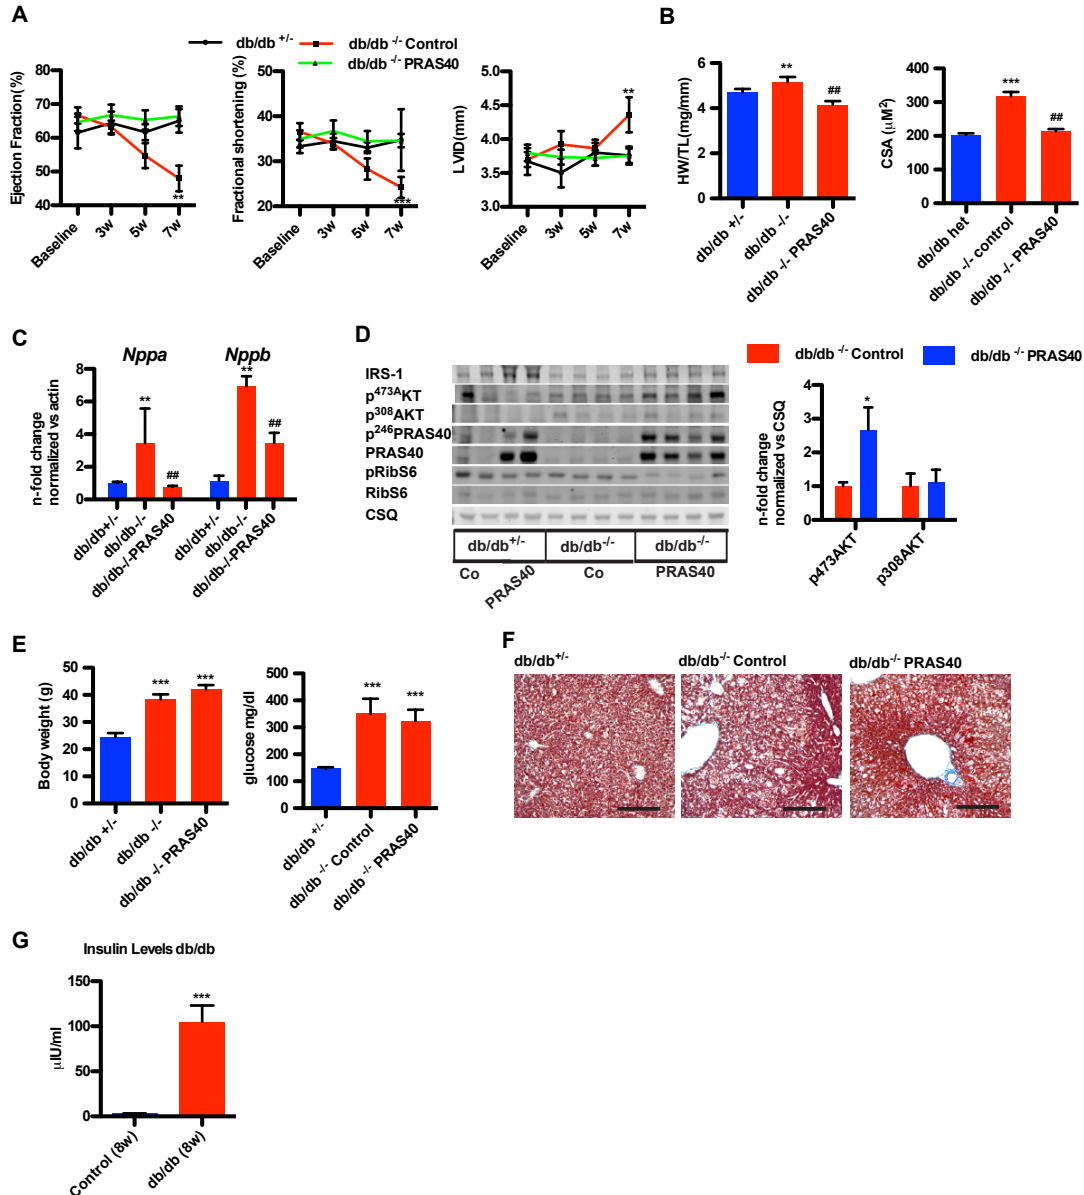

**Supporting Figure 3. PRAS40 prevents diabetic cardiomyopathy in db/db mice.** (A) Line graphs representing echocardiographic assessment of heterozygous control or *db/db* mice for percentage of fractional shortening (FS), ejection fraction (EF) and end-diastolic dimension (LVID), \*\* $p < 0.01$  vs control *db/db*.  $n = 4$  per het and 6 per *db/db* group. (B) Heart weight to tibia length ratio (HW/TL) in the indicated groups.. (\*\* $p < 0.01$  versus control het; ## $p < 0.01$  versus
