# Supplementary material for: PRAS40 prevents development of diabetic cardiomyopathy and improves hepatic insulin sensitivity in obesity
Source: PubMed Central journal article supplement (PMC3936489; doi:10.1002/emmm.201303183), 2013-10-31
Supplement: emmm0006-0057-sd4.pdf [file emmm0006-0057-sd4.pdf]

or AAV-PRAS40 injected animals. (C) Confocal microscopy of paraffin-embedded liver sections after AAV-PRAS40 injections stained for FLAG-tag (red), Actin (green) and nuclei (blue). Only single cells are positive for the FLAG-tag.

### Supporting Figure 3

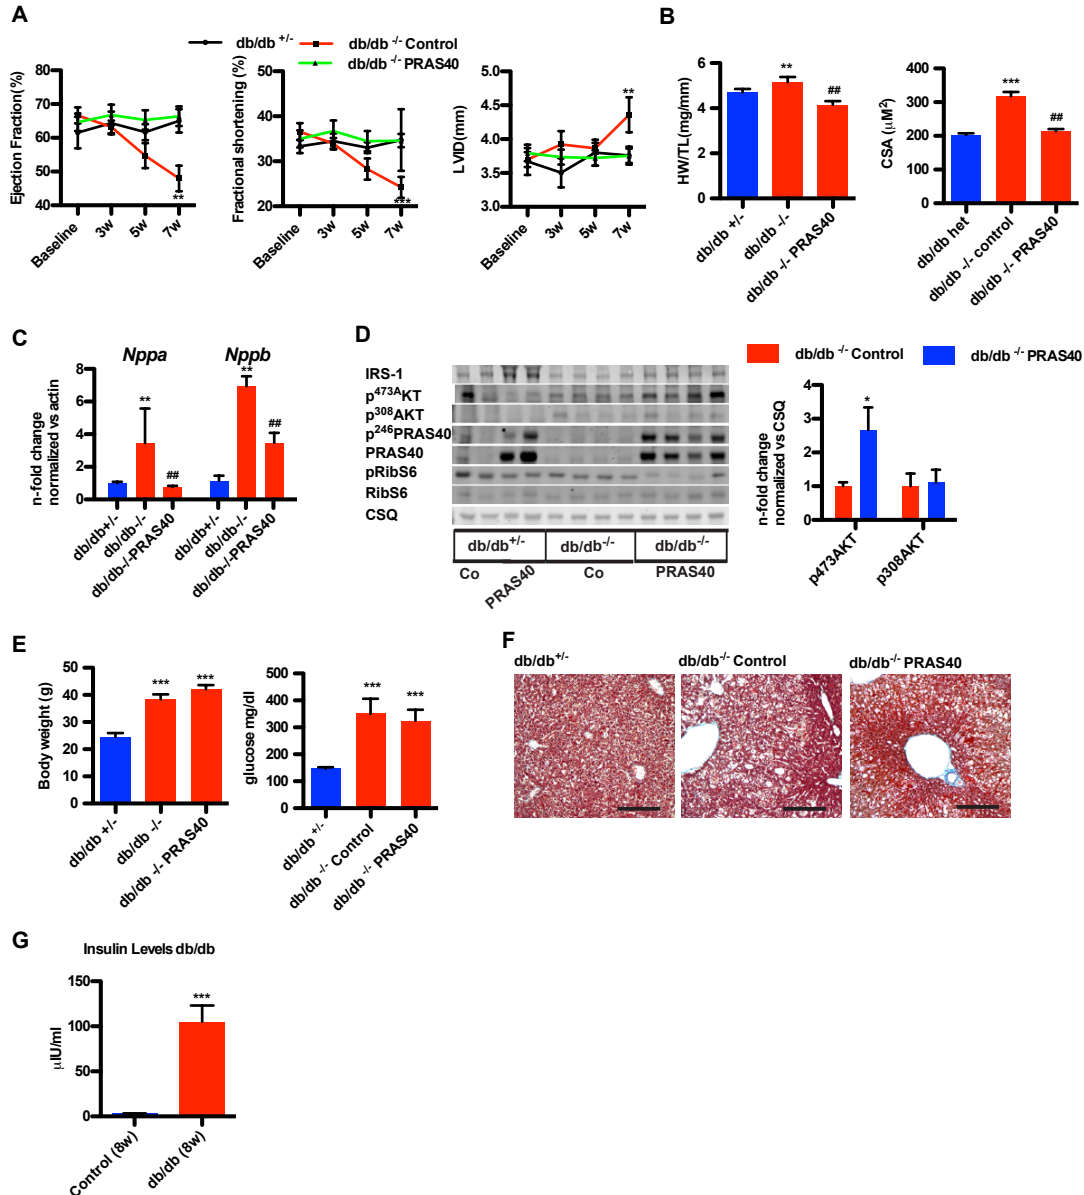

**Supporting Figure 3. PRAS40 prevents diabetic cardiomyopathy in db/db mice.** (A) Line graphs representing echocardiographic assessment of heterozygous control or *db/db* mice for percentage of fractional shortening (FS), ejection fraction (EF) and end-diastolic dimension (LVID), \*\* $p < 0.01$  vs control *db/db*.  $n = 4$  per het and 6 per *db/db* group. (B) Heart weight to tibia length ratio (HW/TL) in the indicated groups.. (\*\* $p < 0.01$  versus control het; ## $p < 0.01$  versus

control *db/db*). CSA in control and PRAS40 mice (\*\**p*<0.01 versus control het; ##*p*<0.01 versus control *db/db*). (C) *Nppa* and *Nppb* levels (\*\**p*<0.01 versus control het; ##*p*<0.01 versus control *db/db*). (D) Immunoblots of whole heart lysates. Barplots depicting quantitation of Akt phosphorylation. \**p*<0.05 versus control. (E) Body weight and glucose levels in the indicated groups \*\*\**p*<0.01 vs hets. (F) Mason-Trichrome staining of liver sections in the indicated groups. Scale bar 150µm (G) Blood insulin levels in the indicated groups. \*\*\**p*<0.01 vs controls. n=5 in each group.

#### Supporting Figure 4

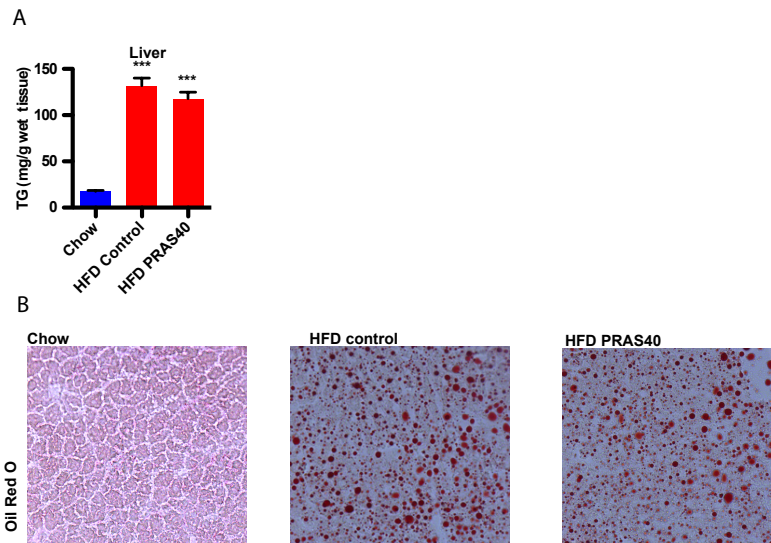

**Supporting Figure 4.** (A) TG content in the liver \*\*\**p*<0.01 versus control chow. (B) Lipid accumulation evidenced by Oil Red O staining. Scale bar 150µm.

#### Supporting Figure 5

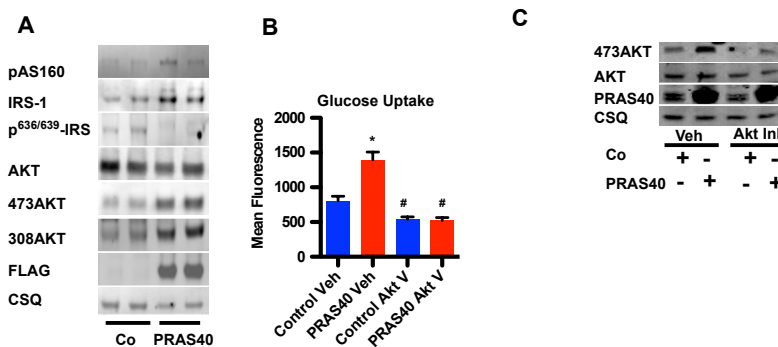

**Supporting Figure 5.** (A) IRS-1 degradation is prevented and Akt phosphorylation is
