# Supplementary material for: PRAS40 prevents development of diabetic cardiomyopathy and improves hepatic insulin sensitivity in obesity
Source: PubMed Central journal article supplement (PMC3936489; doi:10.1002/emmm.201303183), 2013-10-31
Supplement: emmm0006-0057-sd5.pdf [file emmm0006-0057-sd5.pdf]

control *db/db*). CSA in control and PRAS40 mice (\*\**p*<0.01 versus control het; ##*p*<0.01 versus control *db/db*). (C) *Nppa* and *Nppb* levels (\*\**p*<0.01 versus control het; ##*p*<0.01 versus control *db/db*). (D) Immunoblots of whole heart lysates. Barplots depicting quantitation of Akt phosphorylation. \**p*<0.05 versus control. (E) Body weight and glucose levels in the indicated groups \*\*\**p*<0.01 vs hets. (F) Mason-Trichrome staining of liver sections in the indicated groups. Scale bar 150μm (G) Blood insulin levels in the indicated groups. \*\*\**p*<0.01 vs controls. n=5 in each group.

### Supporting Figure 4

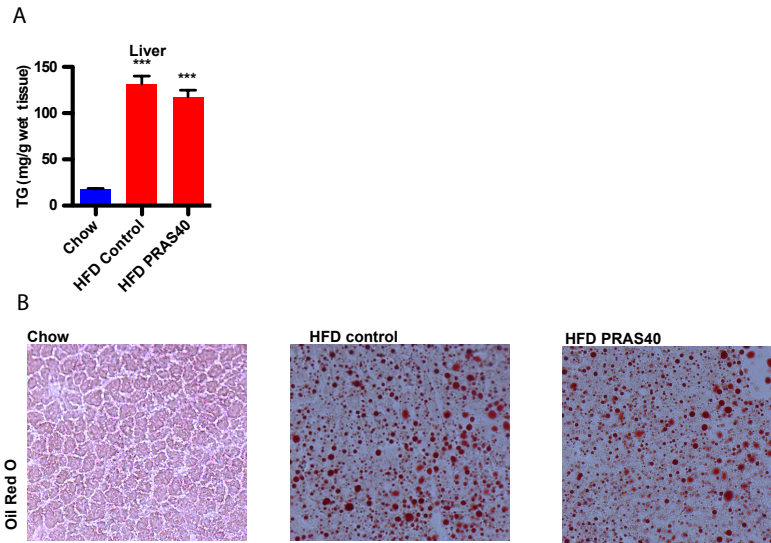

**Supporting Figure 4.** (A) TG content in the liver \*\*\**p*<0.01 versus control chow. (B) Lipid accumulation evidenced by Oil Red O staining. Scale bar 150μm.

### Supporting Figure 5

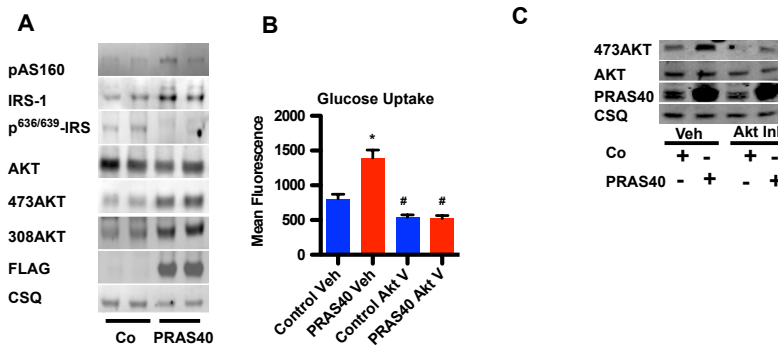

**Supporting Figure 5.** (A) IRS-1 degradation is prevented and Akt phosphorylation is
