# Supplementary material for: PRAS40 prevents development of diabetic cardiomyopathy and improves hepatic insulin sensitivity in obesity
Source: PubMed Central journal article supplement (PMC3936489; doi:10.1002/emmm.201303183), 2013-10-31
Supplement: emmm0006-0057-sd7.pdf [file emmm0006-0057-sd7.pdf]

improved by mTORC1 inhibition with PRAS40. **(B)** Glucose uptake measured is increased in PRAS40 NRCMS. Increase in Glucose Uptake is blocked by Akt inhibition (10 $\mu$ M. Akt V Inhibitor) \*p<0.05 vs Control. #p<0.05 vs Control. Error bars indicate means  $\pm$  sem. **(C)** Immunoblot confirming succesful pharmacological Akt inhibition

**Supplemental Table 1**

|                                |                                |
|--------------------------------|--------------------------------|
| <b>18s Forward</b>             | 5'-CGAGCCGCCTGGATACC-3'        |
| <b>18s Reverse</b>             | 5'-CATGGCCTCAGTTCCGAAAA-3'     |
| <b>ANP Forward</b>             | 5'-TGGGTCTTGTTAGGGCTCAAACCT-3' |
| <b>ANP Reverse</b>             | 5'-TGAAACTCAAGGGACACCCATCGT-3' |
| <b>BNP Forward</b>             | 5'-AATGGCCCAGAGACAGCTCTTGAA-3' |
| <b>BNP Reverse</b>             | 5'-CTTGTGCCCAAAGCAGCTTGAGAT-3' |
| <b>mPRAS40 Forward</b>         | 5'-CGGAGAGCACAGACGACGGC-3'     |
| <b>mPRAS40 Reverse</b>         | 5'-GCACCGACACGGGCAGAGAC-3'     |
| <b>ATP Synthase Beta 1 For</b> | CGTGAGGGCAATGATTTATACCAT       |
| <b>ATP Synthase Beta 1 Rev</b> | TCCTGGTCTCTGAAGTATTCAGCAA      |
| <b>Cytochrome C For</b>        | ACCAAATCTCCACGGTCTGTT          |
| <b>Cytochrome C Rev</b>        | GGATTCTCCAAATACTCCATCAG        |
| <b>Acadm For</b>               | GGAAATGATCAACAAAAAAGAAGTATTT   |
| <b>Acadm Rev</b>               | ATGGCCGCCACATCAGA              |
| <b>Cpt1b For</b>               | TCTAGGCAATGCCGTTTAC            |
| <b>Cpt1b Rev</b>               | GAGCACATGGGCACCATAC            |
| <b>Acadv1 For</b>              | ATCTCTGCCAGCGACTTT             |
| <b>Acadv1 Rev</b>              | TTCTGGCTTGTCAGAACTG            |
| <b>CPT2 For</b>                | AGTATCTGCAGCACAGCATCGTA        |
| <b>CPT2 Rev</b>                | GGCTTCTGTGCACTGAGGTATCT        |

|                                    |                          |
|------------------------------------|--------------------------|
| <b>HK2 For</b>                     | TGCTACAGGTCCGAGCCA       |
| <b>HK2 Rev</b>                     | ATGCTGTCGTCACACGTGC      |
| <b>PKD4 For</b>                    | CCGCTGTCCATGAAGCA        |
| <b>PKD4 Rev</b>                    | GCAGAAAAGCAAAGGACGTT     |
| <b>Acss2 For</b>                   | CTGTGGAGGAGCCACGGGAGTT   |
| <b>Acss2 Rev</b>                   | TGGAGGAATGGGCCAGGGCAT    |
| <b>PFK For</b>                     | CGTTGAGGTAGGAATACTTCTGCA |
| <b>PFK Rev</b>                     | ACCTCTTCCGAAAGGAGTGGA    |
| <b>SC5D For</b>                    | ccaatggctggattcatct      |
| <b>SC5D Rev</b>                    | gtccacagggtgaaaagcat     |
| <b>MVK For</b>                     | gggacgatgtcttcttgaa      |
| <b>MVK Rev</b>                     | gaacttggtcagcctgcttc     |
| <b>UCP3 For</b>                    | TTTGGAGCTGGCTTCTGTG      |
|                                    |                          |
| <b>UCP3 Rev</b>                    | AAGGCCCTCTTCAGTTGCTC     |
| <b>MTE1 For</b>                    | GACCTCCCCAAGAGCATAGA     |
| <b>MTE Rev</b>                     | TCCTTGTAGGAGATGGTGTTC    |
| <b>IDH2 For</b>                    | CCCTATTGCCAGCATCTTTG     |
| <b>IDH2 Rev</b>                    | TGTCCAGGAAGTCTGTGGTG     |
| <b>PDHA1 For</b>                   | GGGACGTCTGTTGAGAGAGC     |
| <b>PDHA1 Rev</b>                   | TGTGTCCATGGTAGCGGTAA     |
| <b>PFKFB2 For</b>                  | CGGGAATGGATCTACTACTGG    |
| <b>PFKFB2 Rev</b>                  | GGAGAGCAAAGTGAGGGA TG    |
| <b>Glut1 For</b>                   | GTCCTGCTCGTATTGCTGTG     |
| <b>Glut1 Rev</b>                   | GCCTTTGGTCTCAGGGACTT     |
| <b>PPAR<math>\alpha</math> For</b> | TCACAAGTGCCTGTCTGTGCG    |
| <b>PPAR<math>\alpha</math> Rev</b> | CAGGTAGGCTTCGTGGATTC     |
| <b>CD36 For</b>                    | GCCAAGCTATTGCGACATGA     |
| <b>CD 36 Rev</b>                   | AAGGCATTGGCTGGAAGAAC     |

**Supplemental Table 2**

| <b>Application</b> | <b>Antibody</b> | <b>Dilution</b> | <b>Amplify</b> | <b>Company</b>        |
|--------------------|-----------------|-----------------|----------------|-----------------------|
| <b>Immunoblot</b>  | Actin           | 1:2000          | no             | Santa Cruz (sc-81178) |
| <b>Immunoblot</b>  | p246PRAS40      | 1:1000          | no             | CST (#2640)           |
