# Supplementary material for: PRAS40 prevents development of diabetic cardiomyopathy and improves hepatic insulin sensitivity in obesity
Source: PubMed Central journal article supplement (PMC3936489; doi:10.1002/emmm.201303183), 2013-10-31
Supplement: emmm0006-0057-sd8.pdf [file emmm0006-0057-sd8.pdf]

|                                    |                          |
|------------------------------------|--------------------------|
| <b>HK2 For</b>                     | TGCTACAGGTCCGAGCCA       |
| <b>HK2 Rev</b>                     | ATGCTGTCGTCACACGTGC      |
| <b>PKD4 For</b>                    | CCGCTGTCCATGAAGCA        |
| <b>PKD4 Rev</b>                    | GCAGAAAAGCAAAGGACGTT     |
| <b>Acss2 For</b>                   | CTGTGGAGGAGCCACGGGAGTT   |
| <b>Acss2 Rev</b>                   | TGGAGGAATGGGCCAGGGCAT    |
| <b>PFK For</b>                     | CGTTGAGGTAGGAATACTTCTGCA |
| <b>PFK Rev</b>                     | ACCTCTTCCGAAAGGAGTGGA    |
| <b>SC5D For</b>                    | ccaatggctggattcatct      |
| <b>SC5D Rev</b>                    | gtccacagggtgaaaagcat     |
| <b>MVK For</b>                     | gggacgatgtcttcttgaa      |
| <b>MVK Rev</b>                     | gaacttggtcagcctgcttc     |
| <b>UCP3 For</b>                    | TTTGGAGCTGGCTTCTGTG      |
|                                    |                          |
| <b>UCP3 Rev</b>                    | AAGGCCCTCTTCAGTTGCTC     |
| <b>MTE1 For</b>                    | GACCTCCCCAAGAGCATAGA     |
| <b>MTE Rev</b>                     | TCCTTGTAGGAGATGGTGTTC    |
| <b>IDH2 For</b>                    | CCCTATTGCCAGCATCTTTG     |
| <b>IDH2 Rev</b>                    | TGTCCAGGAAGTCTGTGGTG     |
| <b>PDHA1 For</b>                   | GGGACGTCTGTTGAGAGAGC     |
| <b>PDHA1 Rev</b>                   | TGTGTCCATGGTAGCGGTAA     |
| <b>PFKFB2 For</b>                  | CGGGAATGGATCTACTCTGG     |
| <b>PFKFB2 Rev</b>                  | GGAGAGCAAAGTGAGGGA TG    |
| <b>Glut1 For</b>                   | GTCCTGCTCGTATTGCTGTG     |
| <b>Glut1 Rev</b>                   | GCCTTTGGTCTCAGGGACTT     |
| <b>PPAR<math>\alpha</math> For</b> | TCACAAGTGCCTGTCTGTGCG    |
| <b>PPAR<math>\alpha</math> Rev</b> | CAGGTAGGCTTCGTGGATTC     |
| <b>CD36 For</b>                    | GCCAAGCTATTGCGACATGA     |
| <b>CD 36 Rev</b>                   | AAGGCATTGGCTGGAAGAAC     |

**Supplemental Table 2**

| <b>Application</b> | <b>Antibody</b> | <b>Dilution</b> | <b>Amplify</b> | <b>Company</b>        |
|--------------------|-----------------|-----------------|----------------|-----------------------|
| <b>Immunoblot</b>  | Actin           | 1:2000          | no             | Santa Cruz (sc-81178) |
| <b>Immunoblot</b>  | p246PRAS40      | 1:1000          | no             | CST (#2640)           |

|                   |                               |        |     |               |
|-------------------|-------------------------------|--------|-----|---------------|
| <b>Immunoblot</b> | PRAS40                        | 1:1000 | no  | CST (#2691)   |
| <b>Immunoblot</b> | pS6Rib                        | 1:2000 | no  | CST (#4857)   |
| <b>Immunoblot</b> | RibS6                         | 1:500  | no  | CST (#2317)   |
| <b>Immunoblot</b> | p4EBP1                        | 1:1000 | no  | CST (#2855)   |
| <b>Immunoblot</b> | p473AKT                       | 1:1000 | no  | CST (#4058)   |
| <b>Immunoblot</b> | p389S6K                       | 1:500  | no  | CST (#9234)   |
| <b>Immunoblot</b> | IRS-1                         | 1:1000 | no  | CST (#2390)   |
| <b>Immunoblot</b> | p389S6K                       | 1:500  | no  | CST (#9205)   |
| <b>Immunoblot</b> | AKT                           | 1:2000 | no  | CST (#2966)   |
| <b>IHC</b>        | $\alpha$ -sarcomeric<br>actin | 1:100  | no  | Sigma (A2172) |
| <b>IHC</b>        | PRAS40                        | 1:100  | no  | CST (#2691)   |
| <b>IHC</b>        | p473AKT                       | 1:50   | yes | CST(#9271)    |
| <b>IHC</b>        | FLAG                          | 1:100  | yes | Sigma (F3165) |
