# Supplementary material for: PRAS40 prevents development of diabetic cardiomyopathy and improves hepatic insulin sensitivity in obesity
Source: PubMed Central journal article supplement (PMC3936489; doi:10.1002/emmm.201303183), 2013-10-31
Supplement: emmm0006-0057-sd9.pdf [file emmm0006-0057-sd9.pdf]

### Supplemental Table 3

|           |          | <b>Control chow</b> |         | <b>HFD Chow</b> |        | <b>PRAS40</b> |         |
|-----------|----------|---------------------|---------|-----------------|--------|---------------|---------|
|           |          | Control             |         | Control         |        | n=10          |         |
|           |          | n=5                 | SEM     | n=10            | SEM    | n=10          | SEM     |
| LVID (mm) | Baseline | 3.67                | 0.1971  | 3.6875          | 0.1727 | 3.6925        | 0.09331 |
|           | 5w       | 3.653333            | 0.17221 | 3.936667        | 0.082  | 3.71          | 0.14799 |
|           | 10w      | 3.768333            | 0.12975 | 4.165556        | 0.0936 | 3.90375       | 0.06279 |
|           | 15w      | 3.744286            | 0.07913 | 4.195555        | 0.048  | 3.9225        | 0.04342 |
|           | 20w      | 3.82625             | 0.16506 | 4.267778        | 0.0738 | 4.008889      | 0.0587  |
|           | 25w      | 3.8075              | 0.22005 | 4.222           | 0.0896 | 3.96          | 0.06149 |
| LVAW (mm) | Baseline | 0.928               | 0.05748 | 0.98            | 0.0503 | 0.9225        | 0.0409  |
|           | 5w       | 0.978               | 0.02375 | 0.92            | 0.0737 | 0.888         | 0.09589 |
|           | 10w      | 0.978               | 0.04663 | 0.978           | 0.0534 | 0.918         | 0.03087 |
|           | 15w      | 1.012               | 0.04188 | 1.02            | 0.0528 | 0.923         | 0.04693 |
|           | 20w      | 0.963333            | 0.03283 | 1.008889        | 0.0275 | 1.008889      | 0.05712 |
|           | 25w      | 1.023333            | 0.08969 | 1.026           | 0.0483 | 0.948         | 0.05827 |
| FS (%)    | Baseline | 33.426              | 2.51014 | 33.32           | 1.4703 | 32.4775       | 2.19714 |
|           | 5w       | 34.538              | 1.29078 | 29.29333        | 1.0351 | 32.6775       | 0.73939 |
|           | 10w      | 33.15               | 0.94532 | 27.415          | 1.7101 | 30.74375      | 1.23782 |
|           | 15w      | 34.456              | 0.74936 | 25.086          | 0.904  | 31.77111      | 1.63553 |
|           | 20w      | 32.99125            | 1.42874 | 21.047          | 0.9831 | 28.3          | 0.72822 |
|           | 25w      | 33.3925             | 1.09984 | 20.915          | 1.2265 | 30.212        | 1.63679 |
| EF (%)    | Baseline | 58.46666            | 4.93392 | 62.555          | 2.2216 | 59.806        | 2.34473 |
|           | 5w       | 61.625              | 2.08043 | 56.51667        | 1.644  | 59.695        | 2.39117 |
|           | 10w      | 60.39286            | 2.48934 | 53.132          | 2.7107 | 57.04111      | 2.10859 |
|           | 15w      | 64.58111            | 2.24515 | 49.861          | 1.4639 | 59.91222      | 2.25469 |
|           | 20w      | 62.24222            | 1.64317 | 42.858          | 1.7548 | 53.842        | 1.40384 |
|           | 25w      | 66.1575             | 3.24625 | 42.72           | 2.087  | 54.84375      | 1.84039 |
| E'A'      | 10w      | 1.172083            | 0.01347 | 0.666643        | 0.1349 | 1.14063       | 0.13156 |
